# Supplementary material
Source: PubMed Central journal article supplement (PMC8522350)
Supplement: djab040_supplementary_data.pdf [file djab040_supplementary_data.pdf]

## **SUPPLEMENTARY MATERIALS**

### **Supplementary Methods**

#### **Collection and Storage of Plasma Samples**

Blood samples were collected from 18 225 males in HPFS from 1993 to 1995, 32 826 females in NHS from 1989 to 1990, 14 916 males in PHS I from 1982 to 1984, 93 676 females in WHI from 1993 to 1998, and 28 345 females in WHS from 1992 to 1995. In HPFS, NHS, PHS I, and WHS, blood samples were collected by participants, mailed overnight on cold-packs, and then spun to collect plasma (delayed processing); in WHI, whole blood was collected at the first screening visit and separately immediately into plasma. All plasma samples have been stored in well-monitored freezers.

**Supplementary Table 1.** Characteristics at blood collection among patients with pancreatic cancer from 5 prospective cohorts with prediagnostic blood samples<sup>a</sup>

| Characteristic                                             | HPFS              | NHS                | PHS I              | WHI               | WHS               | Overall           |
|------------------------------------------------------------|-------------------|--------------------|--------------------|-------------------|-------------------|-------------------|
| No. of patients                                            | 76                | 101                | 70                 | 208               | 37                | 492               |
| Age at blood collection, mean (SD), y                      | 65.6 (7.8)        | 60.5 (6.7)         | 57.0 (8.7)         | 67.0 (7.3)        | 59.1 (8.9)        | 63.4 (8.5)        |
| Age at diagnosis, mean (SD), y                             | 72.7 (8.4)        | 70.7 (7.0)         | 71.9 (9.5)         | 71.9 (7.5)        | 63.4 (9.1)        | 71.1 (8.3)        |
| Female sex, No (%)                                         | 0 (0)             | 101 (100)          | 0 (0)              | 208 (100)         | 37 (100)          | 346 (70.3)        |
| Race/ethnicity, No (%)                                     |                   |                    |                    |                   |                   |                   |
| White                                                      | 71 (93.4)         | 100 (99.0)         | 51 (72.9)          | 178 (85.6)        | 35 (94.6)         | 435 (88.4)        |
| Black                                                      | 1 (1.3)           | 1 (1.0)            | 1 (1.4)            | 14 (6.7)          | 1 (2.7)           | 18 (3.7)          |
| Other                                                      | 1 (1.3)           | 0 (0)              | 0 (0)              | 14 (6.7)          | 0 (0)             | 15 (3.0)          |
| Missing                                                    | 3 (3.9)           | 0 (0)              | 18 (25.7)          | 2 (1.0)           | 1 (2.7)           | 24 (4.9)          |
| Body mass index, mean (SD), kg/m <sup>2</sup>              | 25.7 (3.3)        | 25.6 (5.0)         | 25.8 (2.9)         | 27.4 (5.9)        | 26.4 (5.3)        | 26.4 (5.0)        |
| Physical activity, mean (SD), MET-h/wk                     | 36.9 (38.5)       | 15.4 (17.8)        | 12.0 (11.3)        | 13.0 (13.2)       | 17.4 (21.6)       | 17.4 (22.1)       |
| Tobacco use, No (%)                                        |                   |                    |                    |                   |                   |                   |
| Never                                                      | 26 (34.2)         | 40 (39.6)          | 29 (41.4)          | 96 (46.2)         | 13 (35.1)         | 204 (41.5)        |
| Past                                                       | 42 (55.3)         | 41 (40.6)          | 28 (40.0)          | 92 (44.2)         | 17 (45.9)         | 220 (44.7)        |
| Current                                                    | 8 (10.5)          | 20 (19.8)          | 13 (18.6)          | 17 (8.2)          | 7 (18.9)          | 65 (13.2)         |
| Missing                                                    | 0 (0)             | 0 (0)              | 0 (0)              | 3 (1.4)           | 0 (0)             | 3 (0.6)           |
| Alcohol ( $\geq 1$ drink/day), No (%)                      | 32 (42.1)         | 24 (23.8)          | 23 (32.9)          | 36 (17.3)         | 7 (18.9)          | 122 (24.8)        |
| History of diabetes, No (%)                                | 3 (3.9)           | 5 (5.0)            | 3 (4.3)            | 15 (7.2)          | 3 (8.1)           | 29 (5.9)          |
| Fasting status at blood collection, No (%)                 |                   |                    |                    |                   |                   |                   |
| <8 h                                                       | 23 (30.3)         | 22 (21.8)          | 47 (67.1)          | 0 (0)             | 15 (40.5)         | 107 (21.7)        |
| $\geq 8$ h                                                 | 47 (61.8)         | 72 (71.3)          | 21 (30.0)          | 208 (100)         | 19 (51.4)         | 367 (74.6)        |
| Missing                                                    | 6 (7.9)           | 7 (6.9)            | 2 (2.9)            | 0 (0)             | 3 (8.1)           | 18 (3.7)          |
| Time from blood collection to diagnosis, median (range), y | 6.5 (0.5 to 14.2) | 10.6 (1.2 to 19.1) | 16.4 (1.4 to 24.5) | 5.2 (0.1 to 12.1) | 4.2 (0.4 to 11.3) | 6.7 (0.1 to 24.5) |
| Diagnosis period, No (%)                                   |                   |                    |                    |                   |                   |                   |
| 1984-1989                                                  | 0 (0)             | 0 (0)              | 9 (12.9)           | 0 (0)             | 0 (0)             | 9 (1.8)           |
| 1990-1994                                                  | 2 (2.6)           | 13 (12.9)          | 12 (17.1)          | 0 (0)             | 7 (18.9)          | 34 (6.9)          |
| 1995-1999                                                  | 33 (43.4)         | 30 (29.7)          | 19 (27.1)          | 81 (38.9)         | 23 (62.2)         | 186 (37.8)        |
| 2000-2004                                                  | 25 (32.9)         | 43 (42.6)          | 24 (34.3)          | 102 (49.0)        | 7 (18.9)          | 201 (40.9)        |
| 2005-2009                                                  | 16 (21.1)         | 15 (14.9)          | 6 (8.6)            | 25 (12.0)         | 0 (0)             | 62 (12.6)         |
| Cancer stage, No (%)                                       |                   |                    |                    |                   |                   |                   |
| Localized                                                  | 11 (14.5)         | 19 (18.8)          | 14 (20.0)          | 13 (6.3)          | 8 (21.6)          | 65 (13.2)         |
| Locally advanced                                           | 11 (14.5)         | 12 (11.9)          | 13 (18.6)          | 77 (37.0)         | 7 (18.9)          | 120 (24.4)        |
| Metastatic                                                 | 33 (43.4)         | 44 (43.6)          | 31 (44.3)          | 91 (43.8)         | 20 (54.1)         | 219 (44.5)        |
| Unknown                                                    | 21 (27.6)         | 26 (25.7)          | 12 (17.1)          | 27 (13.0)         | 2 (5.4)           | 88 (17.9)         |
| Median overall survival by stage, mo                       |                   |                    |                    |                   |                   |                   |
| Localized                                                  | 14                | 21                 | 14.5               | 25                | 11.5              | 17                |
| Locally advanced                                           | 10                | 9                  | 9                  | 12                | 10                | 10                |
| Metastatic                                                 | 4                 | 3                  | 3                  | 4                 | 4.5               | 3                 |
| Unknown                                                    | 4                 | 6.5                | 7                  | 5                 | 3                 | 6                 |

<sup>a</sup> HPFS = Health Professionals Follow-Up Study; MET = metabolic equivalent; NHS = Nurses' Health Study; PHS = Physicians' Health Study; SD = standard deviation; WHI = Women's Health Initiative; WHS = Women's Health Study.

**Supplementary Table 2.** Spearman’s rank correlation coefficients between prediagnostic plasma inflammatory biomarkers and covariates among patients with pancreatic cancer from 5 prospective cohorts<sup>a</sup>

| Variable                                  | Inflammatory biomarker score <sup>b</sup> | CRP               | IL-6              | TNF- $\alpha$ R2  | Age               | BMI               |
|-------------------------------------------|-------------------------------------------|-------------------|-------------------|-------------------|-------------------|-------------------|
| Inflammatory biomarker score <sup>b</sup> | 1                                         | 0.70 <sup>c</sup> | 0.73 <sup>c</sup> | 0.60 <sup>c</sup> | 0.18 <sup>c</sup> | 0.35 <sup>c</sup> |
| CRP                                       |                                           | 1                 | 0.50 <sup>c</sup> | 0.23 <sup>c</sup> | -0.005            | 0.34 <sup>c</sup> |
| IL-6                                      |                                           |                   | 1                 | 0.34 <sup>c</sup> | 0.14 <sup>c</sup> | 0.30 <sup>c</sup> |
| TNF- $\alpha$ R2                          |                                           |                   |                   | 1                 | 0.30 <sup>c</sup> | 0.17 <sup>c</sup> |
| Age                                       |                                           |                   |                   |                   | 1                 | -0.06             |
| BMI                                       |                                           |                   |                   |                   |                   | 1                 |

<sup>a</sup> Adjusted for cohort (Health Professionals Follow-Up Study, Nurses’ Health Study, Physicians’ Health Study I, Women’s Health Initiative, Women’s Health Study; also adjusted for sex) and fasting time at blood collection in hours (<4, 4 to <8, 8 to <12,  $\geq$ 12, missing). BMI = body mass index; CRP = C-reactive protein; IL-6 = interleukin-6; TNF- $\alpha$ R2 = tumor necrosis factor- $\alpha$  receptor 2.

<sup>b</sup> Calculated by summing the number of inflammatory biomarkers (C-reactive protein, interleukin-6, and tumor necrosis factor- $\alpha$  receptor 2) with levels above the study population medians.

<sup>c</sup>  $P < .05$ .

**Supplementary Table 3.** Multivariable hazard ratios and 95% confidence intervals for death among patients with pancreatic cancer from 5 prospective cohorts by prediagnostic inflammatory biomarker score, stratified by covariates<sup>a</sup>

| Stratification covariate                | Patients/<br>deaths | Inflammatory biomarker score <sup>b</sup> |                     |                      |                     | <i>P</i> <sub>interaction</sub> <sup>c</sup> |
|-----------------------------------------|---------------------|-------------------------------------------|---------------------|----------------------|---------------------|----------------------------------------------|
|                                         |                     | 0                                         | 1                   | 2                    | 3                   |                                              |
| Sex                                     |                     |                                           |                     |                      |                     | .56                                          |
| Female                                  | 339/315             | (Referent)                                | 1.16 (0.79 to 1.70) | 1.18 (0.81 to 1.71)  | 1.54 (1.06 to 2.25) |                                              |
| Male                                    | 145/143             | (Referent)                                | 0.80 (0.49 to 1.29) | 1.03 (0.57 to 1.89)  | 1.89 (0.87 to 4.11) |                                              |
| Body mass index                         |                     |                                           |                     |                      |                     | .41                                          |
| <25.0 kg/m <sup>2</sup>                 | 211/199             | (Referent)                                | 1.15 (0.79 to 1.69) | 0.95 (0.57 to 1.60)  | 1.56 (0.93 to 2.61) |                                              |
| ≥25.0 kg/m <sup>2</sup>                 | 273/259             | (Referent)                                | 1.14 (0.72 to 1.81) | 1.45 (0.95 to 2.22)  | 1.87 (1.19 to 2.93) |                                              |
| Tobacco use                             |                     |                                           |                     |                      |                     | .80                                          |
| Never                                   | 202/186             | (Referent)                                | 0.88 (0.57 to 1.37) | 1.32 (0.83 to 2.09)  | 1.60 (0.97 to 2.65) |                                              |
| Past                                    | 216/206             | (Referent)                                | 1.55 (0.97 to 2.48) | 1.25 (0.78 to 2.02)  | 2.01 (1.20 to 3.34) |                                              |
| Current                                 | 63/63               | (Referent)                                | 0.47 (0.14 to 1.59) | 1.17 (0.37 to 3.66)  | 0.95 (0.33 to 2.70) |                                              |
| Time from blood collection to diagnosis |                     |                                           |                     |                      |                     | .89                                          |
| <10 y                                   | 347/328             | (Referent)                                | 1.14 (0.79 to 1.63) | 1.22 (0.86 to 1.74)  | 1.53 (1.07 to 2.19) |                                              |
| ≥10 y                                   | 137/130             | (Referent)                                | 0.94 (0.56 to 1.58) | 1.37 (0.75 to 2.48)  | 2.40 (1.11 to 5.19) |                                              |
| Cancer stage                            |                     |                                           |                     |                      |                     | .69                                          |
| Localized                               | 64/60               | (Referent)                                | 2.52 (0.98 to 6.51) | 4.33 (1.14 to 16.44) | 2.52 (0.78 to 8.12) |                                              |
| Locally advanced                        | 120/106             | (Referent)                                | 1.35 (0.61 to 3.00) | 1.59 (0.68 to 3.69)  | 2.04 (0.88 to 4.75) |                                              |
| Metastatic                              | 217/214             | (Referent)                                | 0.92 (0.60 to 1.39) | 1.22 (0.79 to 1.88)  | 1.80 (1.11 to 2.92) |                                              |

<sup>a</sup> Hazard ratios from Cox proportional hazards regression adjusted for age at diagnosis (continuous), cohort (Health Professionals Follow-Up Study, Nurses' Health Study, Physicians' Health Study I, Women's Health Initiative, Women's Health Study; also adjusted for sex), race/ethnicity (white, black, other, missing), smoking status (never, past, current, missing), month of blood collection (2-month intervals), fasting time at blood collection in hours (<4, 4 to <8, 8 to <12, ≥12, missing), diagnosis period (1984-1999, 2000-2009), and cancer stage (localized, locally advanced, metastatic, unknown), excluding the stratification covariate.

<sup>b</sup> Calculated by summing the number of inflammatory biomarkers (C-reactive protein, interleukin-6, and tumor necrosis factor- $\alpha$  receptor 2) with levels above the study population medians.

<sup>c</sup> Test for interaction performed by entering cross-product terms of the score and the stratification variable in Cox proportional hazards regression, evaluated by the likelihood ratio test.

**Supplementary Table 4.** Characteristics at diagnosis among patients with pancreatic cancer from 2 prospective cohorts with prediagnostic diet information<sup>a</sup>

| Characteristic                                | HPFS        | NHS         | Overall     |
|-----------------------------------------------|-------------|-------------|-------------|
| No. of patients                               | 480         | 673         | 1153        |
| Age at diagnosis, mean (SD), y                | 73.5 (9.3)  | 72.3 (8.0)  | 72.8 (8.6)  |
| Female sex, No (%)                            | 0 (0)       | 673 (100)   | 673 (58.4)  |
| Race/ethnicity, No (%)                        |             |             |             |
| White                                         | 439 (91.5)  | 654 (97.2)  | 1093 (94.8) |
| Black                                         | 7 (1.5)     | 9 (1.3)     | 16 (1.4)    |
| Other                                         | 12 (2.5)    | 10 (1.5)    | 22 (1.9)    |
| Missing                                       | 22 (4.6)    | 0 (0)       | 22 (1.9)    |
| Body mass index, mean (SD), kg/m <sup>2</sup> | 25.5 (3.3)  | 26.5 (5.5)  | 26.1 (4.7)  |
| Physical activity, mean (SD), MET-h/wk        | 31.2 (36.2) | 16.0 (20.6) | 22.3 (29.1) |
| Tobacco use, No (%)                           |             |             |             |
| Never                                         | 148 (30.8)  | 280 (41.6)  | 428 (37.1)  |
| Past                                          | 233 (48.5)  | 293 (43.5)  | 526 (45.6)  |
| Current                                       | 39 (8.1)    | 88 (13.1)   | 127 (11.0)  |
| Missing                                       | 60 (12.5)   | 12 (1.8)    | 72 (6.2)    |
| Alcohol ( $\geq 1$ drink/day), No (%)         | 166 (34.6)  | 122 (18.1)  | 288 (25.0)  |
| Diabetes status, No (%)                       |             |             |             |
| No or unreported                              | 382 (79.6)  | 524 (77.9)  | 906 (78.6)  |
| Short-term diabetes ( $\leq 4$ y)             | 23 (4.8)    | 47 (7.0)    | 70 (6.1)    |
| Long-term diabetes ( $> 4$ y)                 | 75 (15.6)   | 102 (15.2)  | 177 (15.4)  |
| Diagnosis period, No (%)                      |             |             |             |
| 1986-1989                                     | 38 (7.9)    | 30 (4.5)    | 68 (5.9)    |
| 1990-1994                                     | 73 (15.2)   | 62 (9.2)    | 135 (11.7)  |
| 1995-1999                                     | 98 (20.4)   | 108 (16.0)  | 206 (17.9)  |
| 2000-2004                                     | 99 (20.6)   | 180 (26.7)  | 279 (24.2)  |
| 2005-2009                                     | 99 (20.6)   | 193 (28.7)  | 292 (25.3)  |
| 2010-2014                                     | 73 (15.2)   | 100 (14.9)  | 173 (15.0)  |
| Cancer stage, No (%)                          |             |             |             |
| Localized                                     | 72 (15.0)   | 88 (13.1)   | 160 (13.9)  |
| Locally advanced                              | 62 (12.9)   | 67 (10.0)   | 129 (11.2)  |
| Metastatic                                    | 222 (46.3)  | 330 (49.0)  | 552 (47.9)  |
| Unknown                                       | 124 (25.8)  | 188 (27.9)  | 312 (27.1)  |
| Median overall survival by stage, mo          |             |             |             |
| Localized                                     | 18          | 19          | 19          |
| Locally advanced                              | 7           | 11          | 8           |
| Metastatic                                    | 3           | 3           | 3           |
| Unknown                                       | 5           | 7           | 6           |

<sup>a</sup> HPFS = Health Professionals Follow-Up Study; MET = metabolic equivalent; NHS = Nurses' Health Study; SD = standard deviation.

**Supplementary Table 5.** Multivariable hazard ratios and 95% confidence intervals for death among patients with pancreatic cancer from 2 prospective cohorts by quartile of the empirical dietary inflammatory pattern score in the prediagnostic period, stratified by covariates<sup>a</sup>

| Stratification covariate | Patients/<br>deaths | Quartile of the empirical dietary inflammatory pattern score |                     |                     |                     | <i>P</i> <sub>interaction</sub> |
|--------------------------|---------------------|--------------------------------------------------------------|---------------------|---------------------|---------------------|---------------------------------|
|                          |                     | 1                                                            | 2                   | 3                   | 4                   |                                 |
| Sex                      |                     |                                                              |                     |                     |                     | .28                             |
| Female                   | 673/655             | (Referent)                                                   | 1.13 (0.90 to 1.41) | 0.98 (0.78 to 1.23) | 1.58 (1.25 to 2.00) |                                 |
| Male                     | 480/463             | (Referent)                                                   | 1.07 (0.81 to 1.41) | 1.01 (0.78 to 1.32) | 1.10 (0.84 to 1.43) |                                 |
| Body mass index          |                     |                                                              |                     |                     |                     | .95                             |
| <25.0 kg/m <sup>2</sup>  | 530/513             | (Referent)                                                   | 1.10 (0.87 to 1.40) | 0.93 (0.73 to 1.20) | 1.39 (1.07 to 1.80) |                                 |
| ≥25.0 kg/m <sup>2</sup>  | 623/605             | (Referent)                                                   | 1.12 (0.87 to 1.43) | 1.07 (0.84 to 1.35) | 1.38 (1.08 to 1.76) |                                 |
| Tobacco use              |                     |                                                              |                     |                     |                     | .65                             |
| Never                    | 428/411             | (Referent)                                                   | 1.02 (0.76 to 1.38) | 0.95 (0.71 to 1.27) | 1.41 (1.05 to 1.91) |                                 |
| Past                     | 526/512             | (Referent)                                                   | 1.19 (0.93 to 1.53) | 1.01 (0.79 to 1.28) | 1.28 (0.99 to 1.65) |                                 |
| Current                  | 127/126             | (Referent)                                                   | 0.62 (0.36 to 1.06) | 0.47 (0.26 to 0.85) | 0.99 (0.59 to 1.65) |                                 |
| Cancer stage             |                     |                                                              |                     |                     |                     | .40                             |
| Localized                | 160/144             | (Referent)                                                   | 0.84 (0.51 to 1.38) | 0.88 (0.53 to 1.45) | 1.12 (0.71 to 1.77) |                                 |
| Locally advanced         | 129/123             | (Referent)                                                   | 0.94 (0.54 to 1.63) | 0.66 (0.39 to 1.11) | 0.96 (0.57 to 1.64) |                                 |
| Metastatic               | 552/549             | (Referent)                                                   | 1.05 (0.82 to 1.34) | 1.06 (0.84 to 1.35) | 1.44 (1.12 to 1.86) |                                 |

<sup>a</sup> Hazard ratios from Cox proportional hazards regression adjusted for age at diagnosis (continuous), cohort (Health Professionals Follow-Up Study, Nurses' Health Study; also adjusted for sex), race/ethnicity (white, black, other, missing), smoking status (never, past, current, missing), diagnosis period (1986-1999, 2000-2014), cancer stage (localized, locally advanced, metastatic, unknown), and total energy intake (continuous), excluding the stratification covariate.

<sup>b</sup> Test for interaction performed by entering cross-product terms of the quartile of the score as an ordinal variable and the stratification variable in Cox proportional hazards regression, evaluated by the likelihood ratio test.

**Supplementary Figure 1.** Overall survival curves by (A) prediagnostic inflammatory biomarker score among patients with pancreatic cancer from 5 prospective cohorts and by (B) empirical dietary inflammatory pattern (EDIP) score among patients from 2 prospective cohorts, adjusted for variables that were included in the primary model. The inflammatory biomarker score was calculated by summing the number of inflammatory biomarkers (C-reactive protein, interleukin-6, and tumor necrosis factor- $\alpha$  receptor 2) with levels above the study population medians.

A

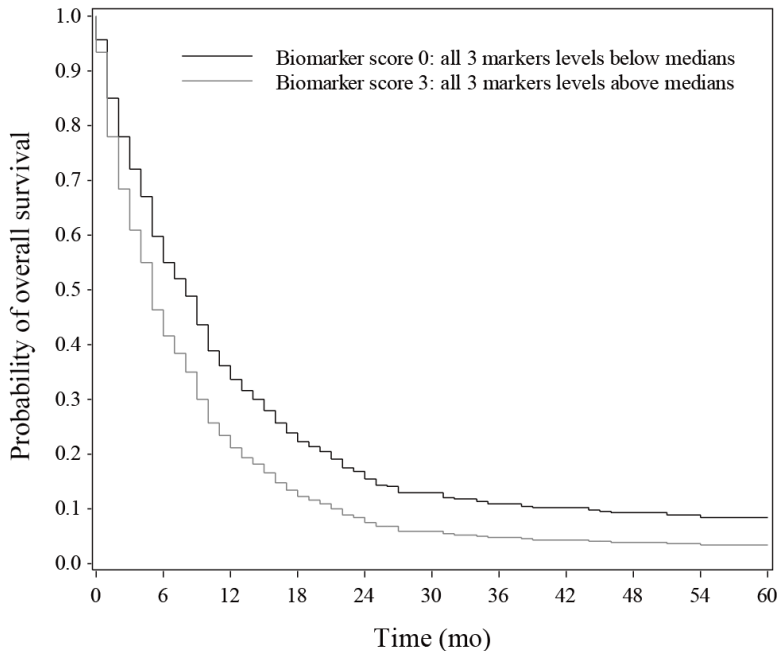

Number at Risk  
 Biomarker score 0  
 Biomarker score 3

|  |     |    |    |    |    |    |    |    |    |   |   |
|--|-----|----|----|----|----|----|----|----|----|---|---|
|  | 111 | 68 | 36 | 25 | 18 | 17 | 14 | 13 | 10 | 9 | 9 |
|  | 115 | 53 | 29 | 14 | 10 | 6  | 4  | 4  | 4  | 4 | 2 |

B

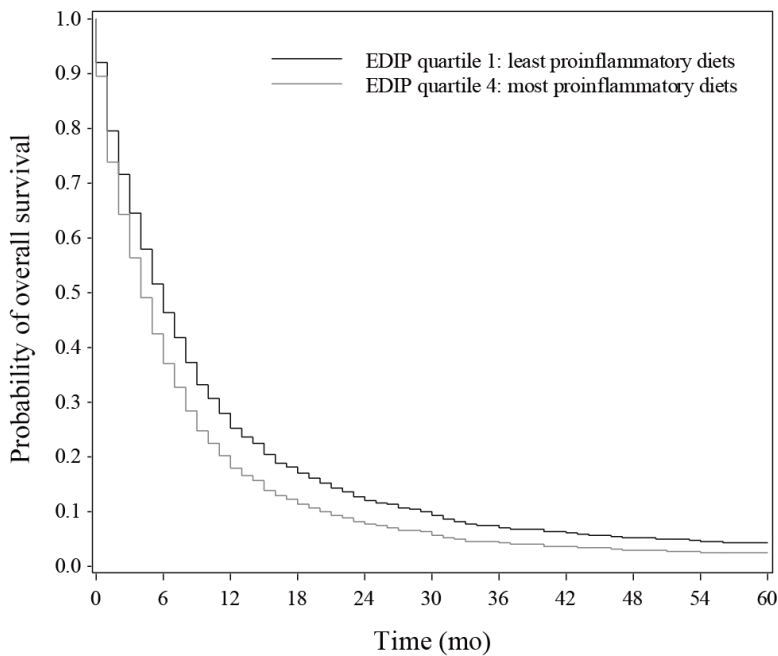

Number at Risk  
 EDIP quartile 1  
 EDIP quartile 4

|  |     |     |    |    |    |    |    |    |    |    |    |
|--|-----|-----|----|----|----|----|----|----|----|----|----|
|  | 288 | 135 | 80 | 50 | 35 | 26 | 18 | 17 | 13 | 11 | 10 |
|  | 288 | 126 | 57 | 31 | 18 | 13 | 8  | 6  | 5  | 4  | 4  |
